# Supplementary material for: The Metabolic Potential of Endophytic Actinobacteria Associated with Medicinal Plant Thymus roseus as a Plant-Growth Stimulator
Source: MDPI journal article supplement (doi:10.3390/microorganisms10091802), 2022-09-07
Supplement: s1 [file s1]

**Table S1:** The beneficial traits in selected endophytic bacteria from *Thymus roseus* *in vitro*.

| Strain Code | Species                                          | Exo-enzymes           |                        |                     | Nitrogen Fixation Capacity <sup>d</sup> |       | Phosphorus <sup>e</sup> | Siderophore production <sup>f</sup> | IAA <sup>g</sup> | Chitinase |
|-------------|--------------------------------------------------|-----------------------|------------------------|---------------------|-----------------------------------------|-------|-------------------------|-------------------------------------|------------------|-----------|
|             |                                                  | Protease <sup>a</sup> | Cellulase <sup>b</sup> | Lipase <sup>c</sup> | NFB                                     | ASHBY |                         |                                     |                  |           |
| XIEG05      | <i>Saccharopolyspora gregorii</i>                | 2.194                 | 2.260                  | +++                 | +                                       | +     | +                       | +                                   | 0.675            | +++       |
| XIEG07      | <i>Streptomyces enissocaesilis</i>               | ++                    | ++++                   | ++                  | +                                       | +     | +                       | -                                   | 0.390            | +++       |
| XIEG10      | <i>Streptomyces gulbargensis</i>                 | 2.810                 | 2.889                  | +++                 | +                                       | +     | +                       | +                                   | 1.133            | +++       |
| XIEG34      | <i>Streptomyces thermoviolaceus</i> <sup>h</sup> | +                     | ++                     | -                   | +                                       | +     | +                       | 1.81212                             | 0.649            | ++        |
| XIEG40      | <i>Streptomyces drozdowiczii</i>                 | 3.470                 | 3.636                  | +++                 | +                                       | +     | +                       | +                                   | 0.313            | -         |
| XIEG41      | <i>Streptomyces olivaceus</i>                    | +                     | 2.744                  | +++                 | +                                       | +     | ++                      | +                                   | 0.279            | +         |
| XIEG45      | <i>Streptomyces enissocaesilis</i>               | ++                    | 2.812                  | +++                 | +                                       | +     | +                       | +                                   | 0.700            | +++       |
| XIEG50      | <i>Streptomyces luteus</i>                       | ++                    | 3.044                  | +++                 | +                                       | +     | ++                      | +                                   | 0.644            | ++        |
| XIEG55      | <i>Streptomyces viridochromogenes</i>            | ++                    | 2.200                  | ++                  | +                                       | +     | +                       | +                                   | 0.229            | ++++      |
| XIEG63      | <i>Saccharopolyspora taberi</i>                  | 1.487                 | ++                     | ++                  | +                                       | +     | +                       | +                                   | 0.262            | -         |

<sup>a</sup>Protease production: "-"no production; "+" weak halo around the colony; "++" clear halo around the colony (1.00-2.00); "+++" that strong halo around the colony (2.00-3.00). <sup>b</sup>Cellulose production: "-"no production; "+" weak halo around the colony (1.00-2.00); "++" clear halo around the colony (2.00-4.00); "+++" that strong halo around the colony (4.00-6.00). <sup>c</sup>Lipase production: "-"no production; "+" weak halo around the colony (1.00); "++" clear halo around the colony (1.00-3.00); "+++" that strong halo around the colony (3.00-5.00). <sup>d</sup>Nitrogen-fixing, "+" indicate the growth. <sup>e</sup>Phosphorus: "-"no production; "+" weak halo around the colony (1.00-1.50); "++" clear halo around the colony (1.50-2.00); <sup>f</sup>Siderophore: "-"no ability; "+" indicates that bacteria can grow on this medium; "++" clear halo around the colony (1.00-2.00). <sup>g</sup>IAA = production of the plant hormone indole-3-acetic acid. Pink color indicated indole production. Values in parentheses refer to the absorbance at 530 nm: CK value of OD530 of 0.08 indicates no production; results (0.08-2.5).

**Table S2:** The beneficial traits in selected endophytic bacteria from *Thymus roseus* *in vitro*.

| Strain Code | Species                            | Inhibition rate/%<br>(Inhibition activity) |        |
|-------------|------------------------------------|--------------------------------------------|--------|
|             |                                    | Tomato                                     | Cotton |
| XIEG05      | <i>Saccharopolyspora gregorii</i>  | 45.43                                      | 20.83  |
| XIEG07      | <i>Streptomyces enissocaesilis</i> | 61.57                                      | 17.98  |
| XIEG10      | <i>Streptomyces gulbargensis</i>   | +                                          | +      |
| XIEG41      | <i>Streptomyces olivaceus</i>      | 33.80                                      | 15.18  |
| XIEG43      | <i>Streptomyces setonii</i>        | +                                          | 12.5   |
| XIEG44      | <i>Nocardiopsis dassonvillei</i>   | 41.03                                      | 16.83  |
| XIEG45      | <i>Streptomyces enissocaesilis</i> | 65.66                                      | 41.38  |
| XIEG47      | <i>Streptomyces pratensis</i>      | 41.57                                      | +      |
| XIEG50      | <i>Streptomyces luteus</i>         | 39.47                                      | ++     |
| XIEG51      | <i>Streptomyces luteus</i>         | 59.40                                      | 44.83  |
| XIEG61      | <i>Nocardiopsis alba</i>           | 42.39                                      | 11.68  |
| XIEG62      | <i>Nocardiopsis alba</i>           | 41.59                                      | 13.96  |

**Table S3:** GC-MS identified components of the antibiosis crude extract of XIEG05 and *V. dahliae* mixture at pH7. Volatile Compounds are listed in ascending order of Retention with at least percentage match  $\leq 70\%$ .

| NO | Retention<br>Time (min) | Compounds                                                           | Percentage<br>Match % | Molecular<br>formula                                            | Molecular<br>Weight |
|----|-------------------------|---------------------------------------------------------------------|-----------------------|-----------------------------------------------------------------|---------------------|
| 1  | 3.387                   | o-Xylene                                                            | 95                    | C <sub>8</sub> H <sub>10</sub>                                  | 106.078             |
| 2  | 3.753                   | Styrene                                                             | 95                    | C <sub>8</sub> H <sub>8</sub>                                   | 104.15              |
| 3  | 8.134                   | Phenylethyl Alcohol                                                 | 94                    | C <sub>8</sub> H <sub>10</sub> O                                | 122.073             |
| 4  | 13.414                  | trans-1,10-Dimethyl-trans-9-decalol                                 | 96                    | C <sub>12</sub> H <sub>22</sub> O                               | 182.167             |
| 5  | 21.192                  | Dibutyl phthalate                                                   | 95                    | C <sub>16</sub> H <sub>22</sub> O <sub>4</sub>                  | 278.152             |
| 6  | 25.939                  | Cyclotetracosane                                                    | 95                    | C <sub>24</sub> H <sub>48</sub>                                 | 336.376             |
| 7  | 26.222                  | Phenol, 2,2'-methylenebis[6-(1,1-dimethylethyl)-4-methyl-           | 95                    | C <sub>69</sub> H <sub>93</sub> O <sub>6</sub> P                | 340.24              |
| 8  | 27.888                  | 9-Tricosene, (Z)-                                                   | 94                    | C <sub>23</sub> H <sub>46</sub>                                 | 322.36              |
| 10 | 27.988                  | Oleyl alcohol, trifluoroacetate                                     | 95                    | C <sub>20</sub> H <sub>35</sub> F <sub>3</sub> O <sub>2</sub>   | 364.259             |
| 11 | 29.704                  | Pyridine-3-carboxamide, oxime, N-(2-trifluoromethylphenyl)-         | 90                    | C <sub>13</sub> H <sub>10</sub> F <sub>3</sub> N <sub>3</sub> O | 281.078             |
| 12 | 30.636                  | Decahydro-8a-ethyl-1,1,4a,6-tetramethylnaphthalene                  | 72                    | C <sub>16</sub> H <sub>30</sub>                                 | 222.235             |
| 13 | 32.519                  | Octasiloxane, 1,1,3,3,5,5,7,7,9,9,11,11,13,13,15,15-hexadecamethyl- | 91                    | C <sub>16</sub> H <sub>48</sub> O <sub>7</sub> Si <sub>8</sub>  | 578.171             |

**Table S4:** GC-MS identified components of the crude extract of XIEG07 at pH7. Volatile compounds are listed in ascending order of Retention Time with at least percentage match  $\leq 70\%$ ).

| NO | Retention Time (min) | Compounds                                                           | Percentage Match % | Molecular formula                                              | Molecular Weight |
|----|----------------------|---------------------------------------------------------------------|--------------------|----------------------------------------------------------------|------------------|
| 1  | 3.254                | Ethylbenzene                                                        | 91                 | C <sub>8</sub> H <sub>10</sub>                                 | 106.078          |
| 2  | 3.37                 | p-Xylene                                                            | 97                 | C <sub>8</sub> H <sub>10</sub>                                 | 106.078          |
| 3  | 8.117                | Phenylethyl Alcohol                                                 | 94                 | C <sub>8</sub> H <sub>10</sub> O                               | 122.073          |
| 4  | 8.217                | Methyl pyrrole-2-carboxylate                                        | 87                 | C <sub>6</sub> H <sub>7</sub> NO <sub>2</sub>                  | 125.048          |
| 6  | 9.816                | Dodecane                                                            | 96                 | C <sub>12</sub> H <sub>26</sub>                                | 170.203          |
| 7  | 13.397               | trans-1,10-Dimethyl-trans-9-decalol                                 | 97                 | C <sub>12</sub> H <sub>22</sub> O                              | 182.167          |
| 8  | 18.394               | Pyrrolo[1,2-a]pyrazine-1,4-dione, hexahydro-                        | 95                 | C <sub>10</sub> H <sub>16</sub> N <sub>2</sub> O <sub>2</sub>  | 154.074          |
| 9  | 19.477               | N-Acetyltyramine                                                    | 76                 | C <sub>10</sub> H <sub>13</sub> NO <sub>2</sub>                | 179.095          |
| 10 | 21.192               | Dibutyl phthalate                                                   | 95                 | C <sub>16</sub> H <sub>22</sub> O <sub>4</sub>                 | 278.152          |
| 11 | 27.872               | Oleyl alcohol, trifluoroacetate                                     | 95                 | C <sub>20</sub> H <sub>35</sub> F <sub>3</sub> O <sub>2</sub>  | 364.259          |
| 12 | 27.988               | Oleyl alcohol, trifluoroacetate                                     | 95                 | C <sub>8</sub> H <sub>9</sub> NO                               | 364.259          |
| 13 | 29.704               | 2,6,10,14-Tetramethyl-7-(3-methylpent-4-enylidene) pentadecane      | 80                 | C <sub>25</sub> H <sub>48</sub>                                | 348.376          |
| 14 | 31.969               | Octasiloxane, 1,1,3,3,5,5,7,7,9,9,11,11,13,13,15,15-hexadecamethyl- | 87                 | C <sub>16</sub> H <sub>48</sub> O <sub>7</sub> Si <sub>8</sub> | 578.171          |
| 15 | 32.819               | Heptasiloxane, 1,1,3,3,5,5,7,7,9,9,11,11,13,13-tetradecamethyl-     | 74                 | C <sub>14</sub> H <sub>42</sub> O <sub>6</sub> Si <sub>7</sub> | 504.152          |
| 16 | 33.568               | Octasiloxane, 1,1,3,3,5,5,7,7,9,9,11,11,13,13,15,15-hexadecamethyl- | 91                 | C <sub>16</sub> H <sub>48</sub> O <sub>7</sub> Si <sub>8</sub> | 578.171          |

**Table S5:** GC-MS identified components of the antibiosis crude extract of XIEG45 and *V. dahliae* mixture at pH7. Volatile Compounds are listed in ascending order of Retention Time with at least percentage match  $\leq 70\%$ .

| NO | Retention Time (min) | Compounds                                                           | Percentage Match % | Molecular formula                                              | Molecular Weight |
|----|----------------------|---------------------------------------------------------------------|--------------------|----------------------------------------------------------------|------------------|
| 1  | 4.719                | Pentanoic acid, 4-methyl-                                           | 90                 | C <sub>6</sub> H <sub>12</sub> O <sub>2</sub>                  | 116.084          |
| 2  | 7.651                | Phenol, 2-methoxy-                                                  | 94                 | C <sub>10</sub> H <sub>12</sub> O <sub>2</sub>                 | 124.052          |
| 3  | 8.067                | Maltol                                                              | 93                 | C <sub>6</sub> H <sub>6</sub> O <sub>3</sub>                   | 126.032          |
| 4  | 8.15                 | Phenylethyl Alcohol                                                 | 93                 | C <sub>8</sub> H <sub>10</sub>                                 | 122.073          |
| 5  | 8.683                | 4H-Pyran-4-one, 2,3-dihydro-3,5-dihydroxy-6-methyl-                 | 95                 | C <sub>6</sub> H <sub>8</sub> O <sub>4</sub>                   | 144.042          |
| 6  | 10.732               | Benzeneacetic acid                                                  | 95                 | C <sub>8</sub> H <sub>8</sub> O <sub>2</sub>                   | 136.052          |
| 7  | 13.747               | Phenol, 3,4-dimethoxy-                                              | 95                 | C <sub>8</sub> H <sub>10</sub> O <sub>3</sub>                  | 154.063          |
| 8  | 20.726               | Pyrrolo[1,2-a]pyrazine-1,4-dione, hexahydro-3-(2-methylpropyl)-     | 94                 | C <sub>10</sub> H <sub>16</sub> N <sub>2</sub> O <sub>2</sub>  | 210.137          |
| 9  | 21.192               | Dibutyl phthalate                                                   | 94                 | C <sub>16</sub> H <sub>22</sub> O <sub>4</sub>                 | 278.152          |
| 10 | 27.888               | 13-Tetradecen-1-ol acetate                                          | 87                 | C <sub>16</sub> H <sub>30</sub> O <sub>2</sub>                 | 254.225          |
| 11 | 29.704               | Octasiloxane, 1,1,3,3,5,5,7,7,9,9,11,11,13,13,15,15-hexadecamethyl- | 76                 | C <sub>16</sub> H <sub>48</sub> O <sub>7</sub> Si <sub>8</sub> | 578.171          |
| 12 | 31.969               | Heptasiloxane, 1,1,3,3,5,5,7,7,9,9,11,11,13,13-tetradecamethyl-     | 74                 | C <sub>14</sub> H <sub>42</sub> O <sub>6</sub> Si <sub>7</sub> | 504.152          |
| 13 | 32.519               | Heptasiloxane, 1,1,3,3,5,5,7,7,9,9,11,11,13,13-tetradecamethyl-     | 99                 | C <sub>14</sub> H <sub>42</sub> O <sub>6</sub> Si <sub>7</sub> |                  |

**Table S6:** GC-MS identified components of the antibiosis crude extract of XIEG51 and *V. dahliae* mixture at pH7. Volatile Compounds are listed in ascending order of Retention Time with at least percentage match  $\leq 70\%$ .

| NO | Retention Time (min) | Compounds                                                           | Percentage Match % | Molecular formula                                              | Molecular Weight |
|----|----------------------|---------------------------------------------------------------------|--------------------|----------------------------------------------------------------|------------------|
| 1  | 3.37                 | Benzene, 1,3-dimethyl-                                              | 95                 | C <sub>8</sub> H <sub>10</sub> Cl <sub>6</sub>                 | 106.078          |
| 2  | 3.77                 | o-Xylene                                                            | 95                 | C <sub>8</sub> H <sub>10</sub>                                 | 106.078          |
| 3  | 8.067                | Maltol                                                              | 93                 | C <sub>6</sub> H <sub>6</sub> O <sub>3</sub>                   | 126.032          |
| 4  | 8.117                | Phenylethyl Alcohol                                                 | 94                 | C <sub>8</sub> H <sub>10</sub> O                               | 122.073          |
| 5  | 8.683                | 4H-Pyran-4-one, 2,3-dihydro-3,5-dihydroxy-6-methyl-                 | 91                 | C <sub>6</sub> H <sub>8</sub> O <sub>4</sub>                   | 144.042          |
| 6  | 10.732               | Benzeneacetic acid                                                  | 91                 | C <sub>8</sub> H <sub>8</sub> O <sub>2</sub>                   | 136.052          |
| 7  | 13.664               | Benzeneethanol, 4-hydroxy-                                          | 87                 | C <sub>14</sub> H <sub>13</sub> N <sub>3</sub> O <sub>2</sub>  | 138.068          |
| 8  | 13.764               | Phenol, 3,4-dimethoxy-                                              | 95                 | C <sub>8</sub> H <sub>10</sub> O <sub>3</sub>                  | 154.063          |
| 10 | 18.577               | Tryptophol                                                          | 95                 | C <sub>10</sub> H <sub>11</sub> F <sub>3</sub> O <sub>2</sub>  | 161.084          |
| 11 | 20.709               | Pyrrolo[1,2-a]pyrazine-1,4-dione, hexahydro-3-(2-methylpropyl)-     | 95                 | C <sub>13</sub> H <sub>10</sub> F <sub>3</sub> NO              | 210.137          |
| 12 | 21.192               | Dibutyl phthalate                                                   | 72                 | C <sub>16</sub> H <sub>22</sub> O <sub>4</sub>                 | 278.152          |
| 13 | 23.907               | Eicosane                                                            | 95                 | C <sub>20</sub> H <sub>42</sub>                                | 282.329          |
| 14 | 24.957               | Heneicosane                                                         | 97                 | C <sub>21</sub> H <sub>44</sub>                                | 296.344          |
| 15 | 25.989               | Tetracosane                                                         | 97                 | C <sub>24</sub> H <sub>50</sub>                                | 338.391          |
| 16 | 26.223               | Phenol, 2,2'-methylenebis[6-(1,1-dimethylethyl)-4-methyl-           | 95                 | C <sub>69</sub> H <sub>93</sub> O <sub>6</sub> P               | 340.24           |
| 17 | 27.888               | Nonadecyl trifluoroacetate                                          | 94                 | C <sub>21</sub> H <sub>39</sub> F <sub>3</sub> O <sub>2</sub>  | 380.29           |
| 18 | 27.972               | 1-Docosene                                                          | 95                 | C <sub>22</sub> H <sub>44</sub>                                | 308.344          |
| 19 | 31.419               | Octasiloxane, 1,1,3,3,5,5,7,7,9,9,11,11,13,13,15,15-hexadecamethyl- | 87                 | C <sub>16</sub> H <sub>48</sub> O <sub>7</sub> Si <sub>8</sub> | 578.171          |
